# Supplementary material
Source: PubMed Central journal article supplement (PMC4067979)
Supplement: NIHMS587614-supplement-01.pdf [file NIHMS587614-supplement-01.pdf]

# Insulin-Ki67-Dapi

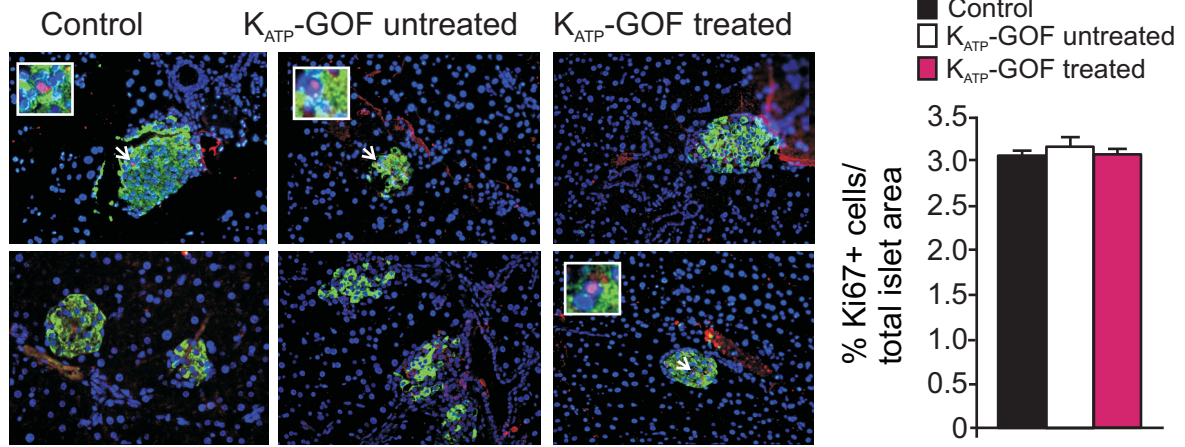

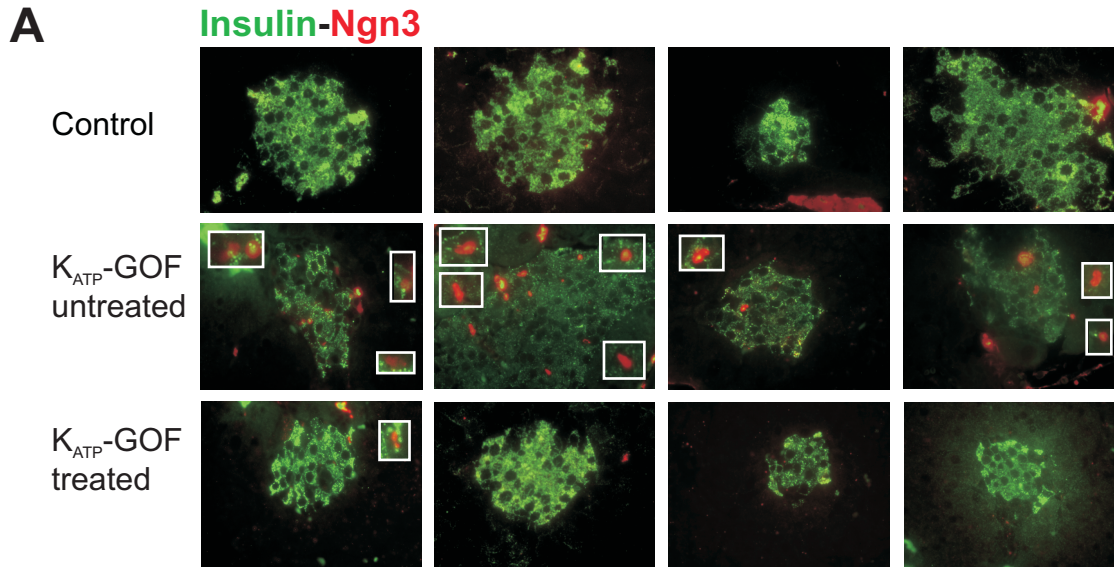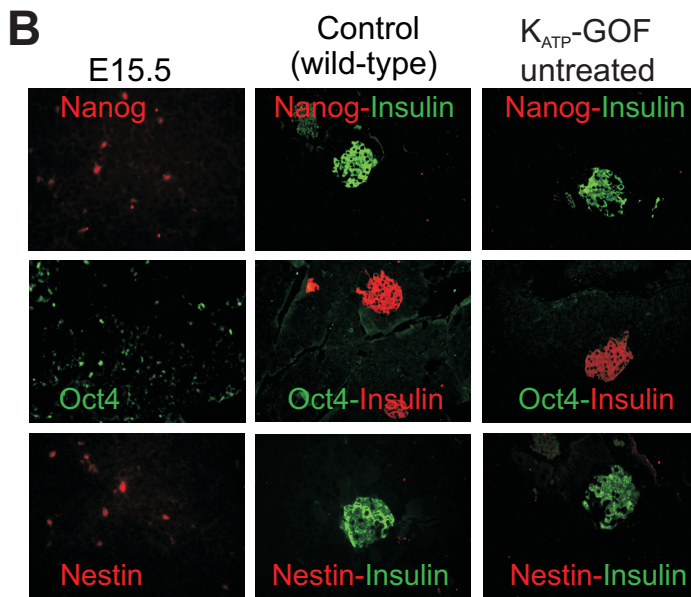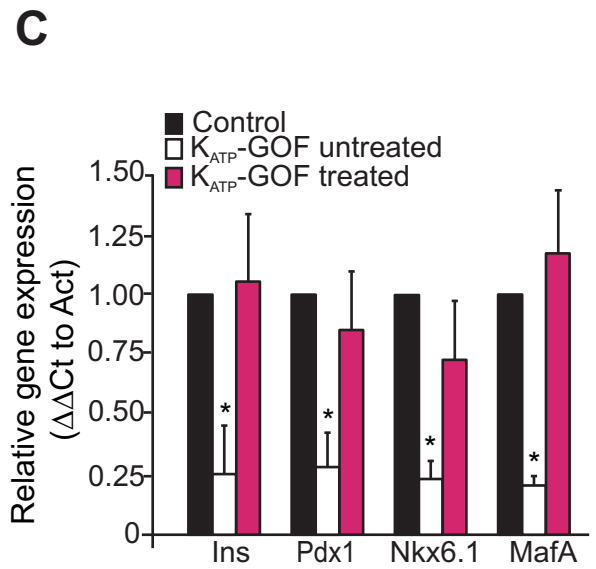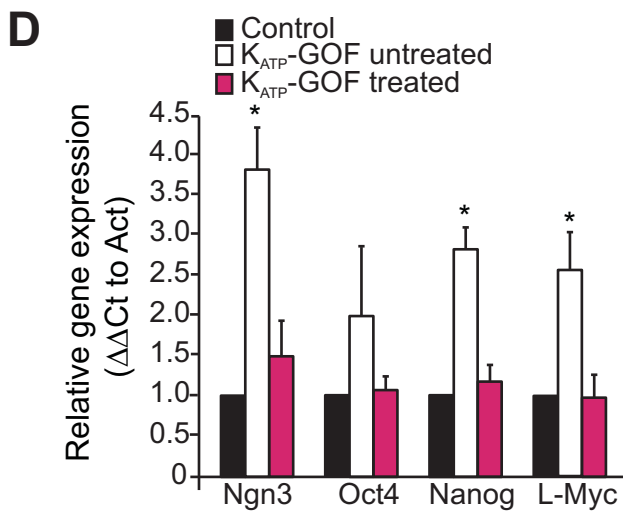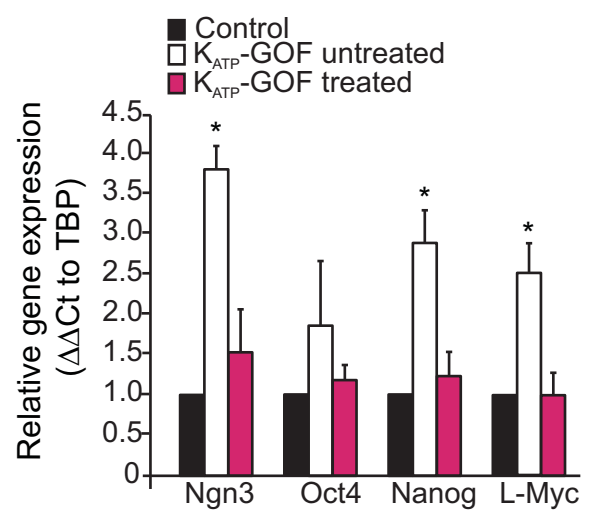

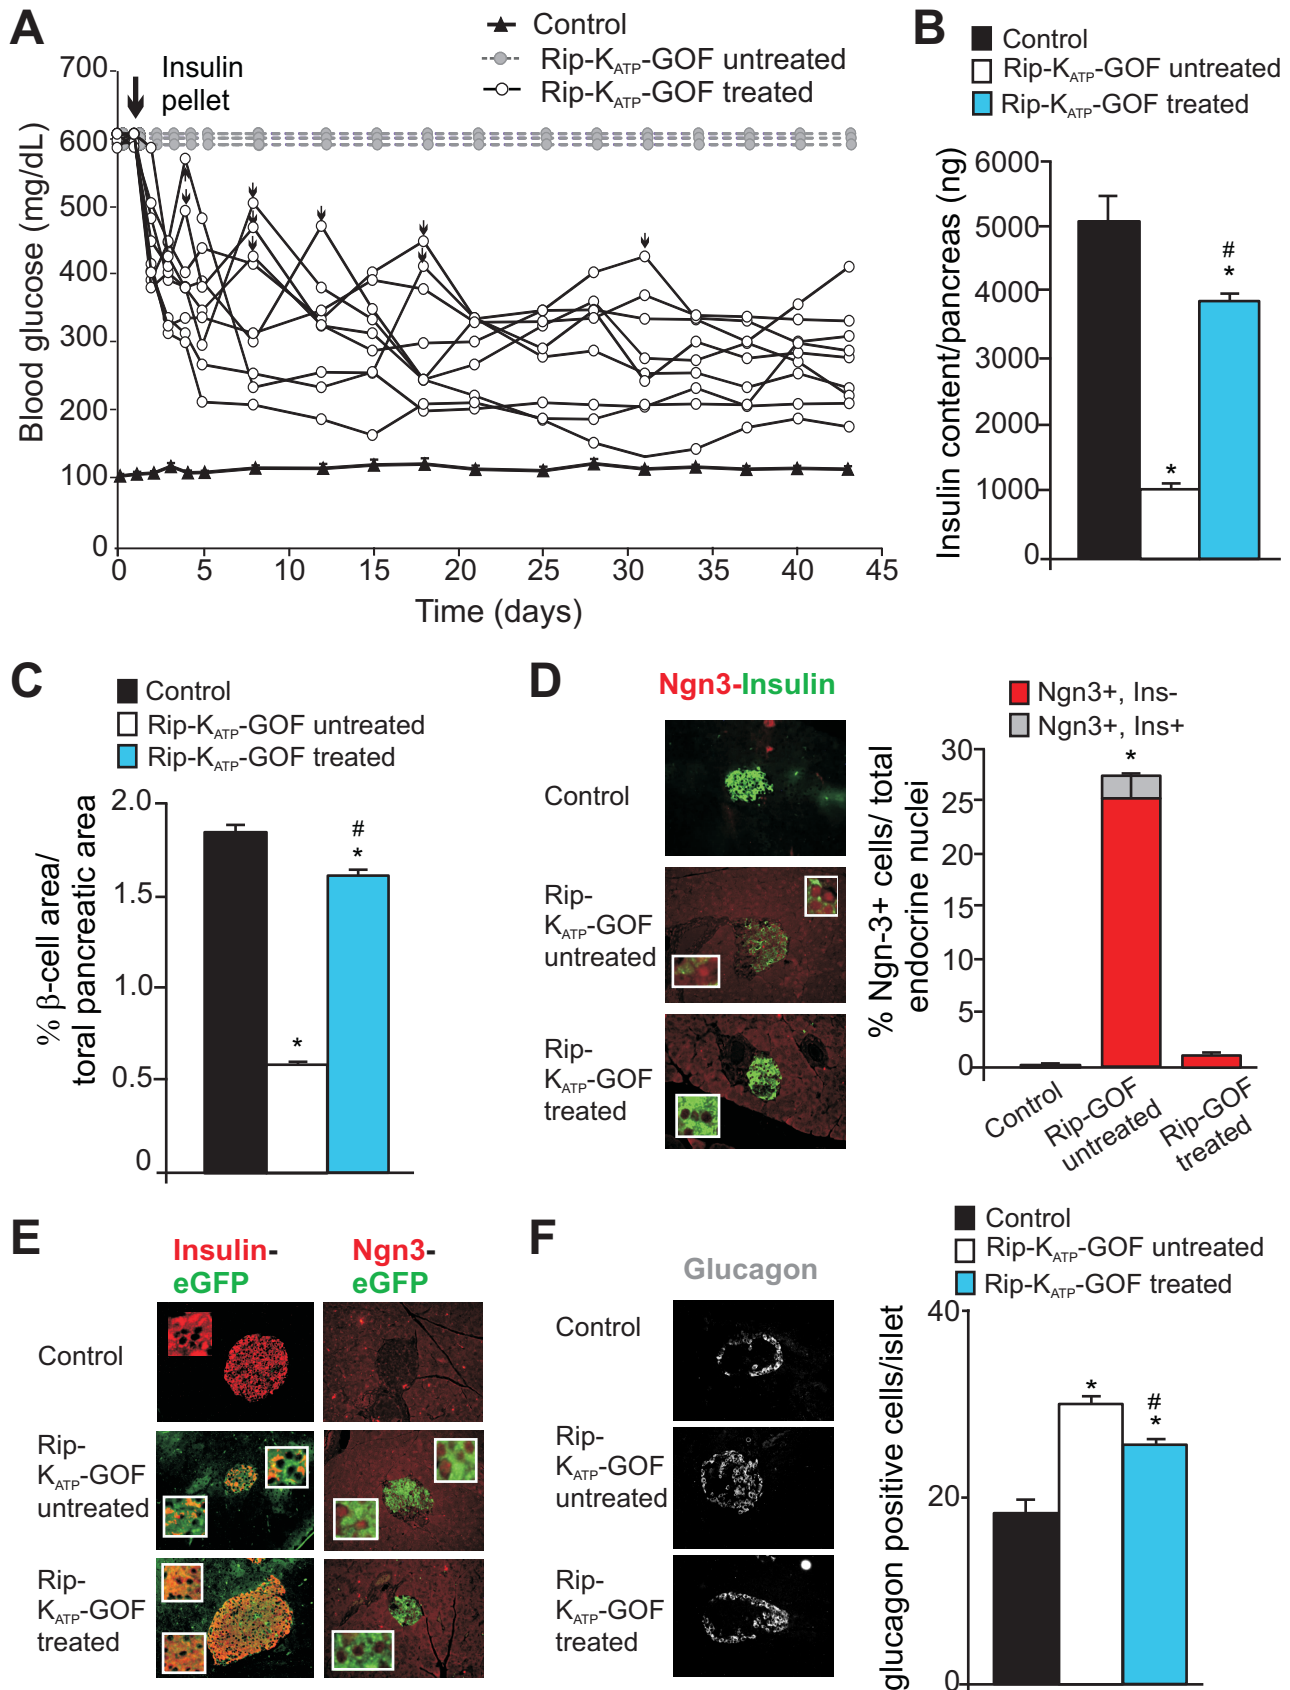

### **Supplemental information**

**Figure S1. Similar rate of proliferation in  $K_{ATP}$ -GOF untreated and insulin-treated mice, related to Figure 3.** (left panels) Representative images of mouse pancreatic sections immunostained for insulin (green) and Ki67 (red), co-stained nuclei with Dapi; and (right panel) percentage of Ki67 positive cells per total islet area of control (black) and  $K_{ATP}$ -GOF untreated (white) and insulin-treated (pink) (mean  $\pm$  SEM). Data represent n=5 mice per group, 5 pancreatic sections per mouse. While bordered insets show  $\beta$ -cell nuclei co-stained for both Ki67 and Dapi.

**Figure S2. Increases in cell dedifferentiation markers and reduction of specific  $\beta$ -cell markers in diabetic islets, related to Figure 4.** (A) Representative pancreatic sections from control and  $K_{ATP}$ -GOF untreated and insulin-treated mice double immunostained for insulin (green) and Ngn3 using BCBC antibody (red). (B) Representative images of mouse pancreatic sections from E15.5 fetal tissue, control (wild type), and untreated  $K_{ATP}$ -GOF mice immunostained for Nanog, Oct4, Nestin and insulin as indicated. (C,D) Real-time PCR mRNA levels on islets from control, and  $K_{ATP}$ -GOF diabetic and insulin-treated mice. Message levels are shown as relative values using  $\beta$ -actin (Act) as reference gene for  $\beta$ -cell markers (C), and  $\beta$ -actin (Act, left panel) and TATA Binding Protein (TBP, right panel) as reference genes for stem cell markers (D). Data represent mean  $\pm$  SEM, n=4 mice per group, samples processed in triplicates. Significant differences \*p<0.05 with respect to control.

**Figure S3. Similar loss of insulin-containing cells and  $\beta$ -cell dedifferentiation is present in another mouse model of neonatal diabetes, related to Figures 2, 4, 5 and 7.** (A) Fed blood glucose in control (average, black triangles) and in Rip- $K_{ATP}$ -GOF untreated (individual traces grey circles, dashed line) and insulin-treated (individual



traces, white circles, solid line). Big arrow indicates first insulin pellet implantation, and small arrows a second insulin pellet implanted in individual mice as necessary (blood glucose >400mg/dl) (n= 3-9 mice per group). **(B,C)** Total insulin content per pancreas **(B)** and pancreatic  $\beta$ -cell mass **(C)** in control (black) and in Rip-K<sub>ATP</sub>-GOF untreated (white) and insulin-treated (blue) mice. **(D)** (left panels) Representative pancreatic sections from control and Rip-K<sub>ATP</sub>-GOF untreated and insulin-treated mice double immunostained for insulin (green) and Ngn3 (red) and (right panel) percentage of Ngn3 positive cells, either insulin negative (red) or insulin positive (grey). Data represent n=3-6 mice per group, 5 pancreatic sections per mouse, mean  $\pm$  SEM \*Significant differences p<0.05 with respect to control and K<sub>ATP</sub>-GOF insulin treated mice. **(E)** Representative pancreatic sections from control and Rip-K<sub>ATP</sub>-GOF untreated and insulin-treated mice double immunostained for e-GFP (indicating transgene expression in pancreatic  $\beta$ -cells, green) and insulin or Ngn3 (red) Data represent n=3-6 mice per group, 5 pancreatic sections per mouse. **(F)** (left panels) Representative pictures of glucagon immunostaining on pancreatic sections from control and untreated and insulin-treated Rip-K<sub>ATP</sub>-GOF mice and (right panel) quantification of glucagon positive cells. N= 3-6 mice per group, 5 pancreatic sections per mouse, mean  $\pm$  SEM Significant differences \*p<0.05 with respect to control and #p<0.05 with respect to untreated Rip-K<sub>ATP</sub>-GOF mice.
